# Supplementary material for: Lightweight MWCNT/hollow mesoporous carbon/WPU composite material with excellent electromagnetic shielding performance
Source: Royal Society of Chemistry journal article supplement (doi:10.1039/d1ra04145b), 2021-01-01
Supplement: d1ra04145b1.pdf [file d1ra04145b1.pdf]

Table S1 The content of filler

|                          | <b>MWCNT</b> | <b>WPU</b> | <b>MCHMs</b> |
|--------------------------|--------------|------------|--------------|
| <b>MWCNT-20</b>          | 20wt%        | 20wt%      | 0            |
| <b>MWCNT-40</b>          | 40wt%        | 40wt%      | 0            |
| <b>MWCNT-40/MCHMs-10</b> | 40wt%        | 50wt%      | 10wt%        |
| <b>MWCNT-60</b>          | 60wt%        | 40wt%      | 0            |
| <b>MCHMs-10</b>          | 0            | 90wt%      | 10wt%        |
